# Supplementary material
Source: PubMed Central journal article supplement (PMC8134267)
Supplement: AJNR-07-00135.pdf [file AJNR-07-00135.pdf]

**On-line Table 1: Baseline patient characteristics\***

|                  | RR         | PP+SP      |
|------------------|------------|------------|
|                  | (n = 26)   | (n = 14)   |
| Age              | 36.0 ± 6.6 | 43.5 ± 5.6 |
| Age range        | 25–48      | 34–52      |
| Female           | 20 (77%)   | 7 (50%)    |
| Disease duration | 6.7 ± 5.6  | 9.8 ± 6.0  |
| Age at onset     | 29.3 ± 7.5 | 33.7 ± 7.1 |
| EDSS             | 3.4 ± 0.3  | 5.1 ± 0.3  |
| AI               | 1.7 ± 0.2  | 2.6 ± 0.4  |

**Note:**—RR indicates relapsing-remitting; PP, primary-progressive (n = 7); SP, secondary-progressive (n = 7); EDSS, Expanded Disability Status Scale; AI, Ambulation Index.

\* Reported are range and/or mean ± SD. Age and durations are given in years. The baseline characteristics of patients with PP and SP were not different except for duration of disease (PP, 6.3 ± 2.4 years and SP, 13.3 ± 6.6 years).

**On-line Table 2: Size group comparison of characteristics of lesion formation\***

|                    | Large (n = 74) |        | Small (n = 229) |        | Mann-Whitney<br>Large-Small |
|--------------------|----------------|--------|-----------------|--------|-----------------------------|
|                    | Mean ± SD      | Median | Mean ± SD       | Median |                             |
| Hyperintensity [–] | 0.31 ± 0.06    | (0.31) | 0.26 ± 0.06     | (0.26) | <.0001                      |
| Residual [–]       | 0.23 ± 0.10    | (0.24) | 0.29 ± 0.12     | (0.29) | .0001                       |
| Total duration     | 8.05 ± 2.13    | (7.64) | 9.21 ± 5.68     | (7.58) | .9343                       |
| Acute activity     | 1.11 ± 0.49    | (1.02) | 0.99 ± 0.65     | (0.85) | .0053                       |
| Subacute activity  | 6.78 ± 1.93    | (6.55) | 7.95 ± 5.76     | (6.08) | .6318                       |

\* Large lesions (volume >0.6 mL, n = 74) exhibited significantly greater hyperintensity but proportionally less residual than small lesions (n = 229). Reported are mean ± SD, median, and the significance of a rank-sum (Mann-Whitney) test.

**On-line Table 3: Comparison of new lesion activity dynamics between clinical phenotypes of relapsing (RR), primary (PP), and secondary-progressive (SP) MS\***

| New Lesion Occurrence          | RR<br>(26 patients) |          | SP<br>(7 patients) |          | PP<br>(7 patients) |          | Mann-Whitney |              |       |
|--------------------------------|---------------------|----------|--------------------|----------|--------------------|----------|--------------|--------------|-------|
|                                | mean ± SD           | (median) | mean ± SD          | (median) | mean ± SD          | (median) | RR-SP        | RR-PP        | SP-PP |
| Total New Lesions              | 262 (25 patients)   |          | 34 (3 patients)    |          | 7 (2 patients)     |          |              |              |       |
| Lesions per Patient: mean ± SD | 10.1 ± 10.2         |          | 4.9 ± 6.9          |          | 21.0 ± 1.7         |          | 0.097        | <b>0.002</b> | 0.333 |
| Median (Range)                 | 8 (0–42)            |          | 0 (0–16)           |          | 0 (0–4)            |          |              |              |       |
| New Lesion Dynamics            | RR (n = 262)        |          | SP (n = 34)        |          | PP (n = 7)         |          | Mann-Whitney |              |       |
|                                | mean ± SD           | (median) | mean ± SD          | (median) | mean ± SD          | (median) | RR-SP        | RR-PP        | SP-PP |
| Hyperintensity                 | 0.28 ± 0.06         | (0.28)   | 0.25 ± 0.07        | (0.23)   | 0.28 ± 0.04        | (0.27)   | <b>0.002</b> | 0.994        | 0.053 |
| Residual Fraction              | 0.27 ± 0.11         | (0.27)   | 0.30 ± 0.12        | (0.29)   | 0.38 ± 0.09        | (0.40)   | 0.276        | <b>0.014</b> | 0.053 |
| Total Duration                 | 9.12 ± 5.23         | (8.01)   | 7.26 ± 3.22        | (6.47)   | 9.61 ± 5.29        | (7.17)   | <b>0.009</b> | 0.922        | 0.224 |
| Acute Activity                 | 0.98 ± 0.55         | (0.89)   | 1.28 ± 0.97        | (0.95)   | 1.13 ± 0.76        | (0.98)   | 0.150        | 0.686        | 0.826 |
| Subacute Activity              | 7.89 ± 5.26         | (6.60)   | 5.75 ± 3.32        | (5.07)   | 8.31 ± 5.63        | (5.71)   | <b>0.001</b> | 0.902        | 0.298 |
| Peak Size [mL]                 | 0.65 ± 1.47         | (0.23)   | 0.32 ± 0.49        | (0.12)   | 0.37 ± 0.63        | (0.13)   | <b>0.004</b> | 0.269        | 0.385 |

\* RRMS showed a trend to greater number of new lesions that are larger and have longer activity durations. Lesions in PPMS appear to leave greatest residual damage. Mean ± SD are reported, P-values give significance of comparison from a rank order (Mann-Whitney) test. Activity durations are given in weeks, size in mL. Bold indicates XX.
